# Supplementary material
Source: HighWire-hosted journal article supplement (https://cmaj.ca/highwire/filestream/150992/field_highwire_adjunct_files/1/240061-res-2-at.pdf)
Supplement: 240061-res-2-at.pdf [file 240061-res-2-at.pdf]

## Appendix B

### Interview Guide

#### ***Demographic and Background Information***

- Pseudonym?
- Gender identity?
- Pronouns?
- Province?
- Age?
- Ethnic and/or racial identity?
- Occupation? Education? (other rapport-building questions that seem appropriate to interviewer)
- Other salient identities you wish to describe?

#### ***Contextualization***

- How did you come to identify as trans, non-binary, etc. [use term they use to answer previous ‘gender identity’ question]? What was that like for you?
- Tell me about your surgery (e.g., circumstances leading up to it, diagnosis, communication with doctors and their offices, travel to/arrival at hospital, etc.).
- Describe for me, in detail, the months/weeks/days leading up to the day of surgery [and day of surgery].
- [Do you remember anything about the surgery itself? What was that like?]
- Think about when you woke up from surgery. Describe your experience [in hospital and recovery at home] starting with that moment.

#### ***Clarification of Phenomenon***

- Was there one particular feature of/moment during your experience that stands out in your mind? What happened? What were you thinking at the time? Thinking afterward? What surprised you?
- How have your thoughts about this experience changed over time? Have you changed your behaviour (in any medical/healthcare settings/circumstances) as a result of having this experience?

#### ***Follow-Up Questions Throughout***

- You mentioned X. Tell me what that was like for you.
- You mentioned Y. Describe that in more detail for me.
